# Supplementary material for: Staudinger ligation towards cyclodextrin dimers in aqueous/organic media. Synthesis, conformations and guest-encapsulation ability
Source: publisher site journal article supplement (doi:10.3762/bjoc.10.73), 2014-04-03
Supplement: Additional file 1 [file 1860-5397-10-73-S1.pdf]

# **Supporting Information**

for

## **Staudinger ligation towards cyclodextrin dimers in aqueous/organic media. Synthesis, conformations and guest-encapsulation ability**

Malamatenia D. Manouilidou, Yannis G. Lazarou, Irene M. Mavridis, Konstantina Yannakopoulou\*

Address: Institute of Advanced Materials, Physicochemical Processes,  
Nanotechnology & Microsystems, National Center for Scientific Research  
“Demokritos”, Terma Patriarchou Gregoriou & Neapoleos, Aghia Paraskevi Attikis,  
15310 Greece. Tel. +30210 6503796, Fax: +30 210 6511766

Email: Konstantina Yannakopoulou - dyanna@chem.demokritos.gr

\*Corresponding author

**Experimental, analytical and computational data**

## Experimental

NMR experiments were performed on either a 250 MHz Avance III or a 500 MHz Avance DRX Bruker NMR spectrometer using the library 2D sequences and 90 degree pulses. For ROESY experiments, a spinlock time of 300–350 ms was used. DOSY NMR experiments: Samples of 4 cm height were used to ensure gradient linearity along the volume. The temperature was kept at  $298.0 \pm 0.1$  K (air flow 535 L/min). The measured 90 degree pulses were 10  $\mu$ s. A delay  $d1 = 4 * T_1$  was inserted for the measurements, which were carried out with the gradient spin echo sequence *ledbpgspr2s1d* employing a presaturation step. Data were acquired with 32 or 16 scans for each gradient step, 4 dummy scans, a 2.5 ms gradient pulse ( $\delta$ ), a linear gradient of 16–32 steps between 2% and 95% and diffusion time ( $\Delta$ ) 100 ms. Total acquisition times were 31 min or 62 min. Processing was carried out with Bruker's Topspin 2.1 software

### Synthetic procedures

1,4-Diiodo-p-xylene, 4-methyl-2,5-diiodobenzoic acid [1], 2,5-diiodoterephthalic acid [1], dimethyl 2,5-diiodoterephthalate [2] and mono(6-p-toluenesulfonyl)- $\beta$ -cyclodextrin [3] were prepared according to the literature. Linker **2** was prepared according to ref. [4].

*Dimethyl 2,5-bis(diphenylphospanyl)terephthalate (3)*.– To a solution of dimethyl 2,5-diiodoterephthalate [2] (100 mg, 0.224 mmol) in dry THF (3 mL), triethylamine (125  $\mu$ L, 0.896 mmol) was added followed by a catalytic amount of palladium acetate. The solution was degassed using argon, diphenylphosphine was added (78  $\mu$ L, 0.448 mmol) and the solution was left under argon and stirring at 70 °C for 12 h. Then, the solution was allowed to acquire rt and the solvent was evaporated under reduced pressure. The residue was dissolved in  $\text{CHCl}_3:\text{H}_2\text{O}$  (1:1, v/v) (84 mL), the two phases were separated and the organic phase was washed with  $\text{HCl}_{(\text{aq})}$  (1 M, 4 mL). Then, the solvent was evaporated under reduced pressure

and a small amount of DMF was added to the resulted solid. The desired product was isolated after centrifugation as an orange solid and dried under vacuum (126 mg, 100%). The product was stored under argon at  $-20\text{ }^{\circ}\text{C}$ .  $R_f = 0.57$  (eluent:  $\text{CHCl}_3$ ). m.p.:  $199.0\text{-}201.0\text{ }^{\circ}\text{C}$  (dec).  $^1\text{H}$  NMR ( $\text{CDCl}_3$ , 500 MHz, 298 K)  $\delta$  7.55-7.40 (m, 22H, -Ar), 3.57 (s, 6H,  $-\text{OCH}_3$ ).  $^{13}\text{C}$  NMR ( $\text{CDCl}_3$ , 125 MHz)  $\delta$  166.8 ( $-\text{COO}-$ ), 141.1, 140.9 (C1), 137.1 136.9, 136.1, 134.2, 134.0, 129.2, 128.8 (-Ar), 52.2 ( $-\text{OCH}_3$ ).  $^{31}\text{P}$  NMR ( $\text{CDCl}_3$ , 202.5 MHz, 298K)  $\delta$  -3.9. MS (ESI): m/z 563.3  $[\text{M}+\text{H}]^+$ , calcd. for  $[\text{C}_{34}\text{H}_{27}\text{O}_4\text{P}_2\text{H}]^+$ : 563.15.

*Mono[6-(3-azidopropylamino-6-deoxy)]- $\beta$ -cyclodextrin.* A solution of dry mono(6-*p*-toluenesulfonyl)- $\beta$ -cyclodextrin [3] (80 mg, 0.06 mmol) in 3-azidopropylamine (0.1 mL) was left under stirring for 14 h at  $80\text{ }^{\circ}\text{C}$ .  $\text{H}_2\text{O}$  then was added (5 mL) and the solvents were evaporated under reduced pressure. The oily mixture was dissolved in  $\text{H}_2\text{O}$ , the pH of the solution was adjusted to 9 with  $\text{NaOH}_{(\text{aq})}$  (10%, v/v) and a cation-exchange resin (Amberlite IR120,  $\text{H}^+$ , 1.4 g) was added to remove extra 3-azidopropylamine. The mixture was filtered, the pH of the filtrate was adjusted to 9 with  $\text{NaOH}_{(\text{aq})}$  (10%, v/v) and a anion-exchange resin (Amberlite IRA-400, 600 mg) was added to remove free *p*-toluenesulfonic acid. The mixture was filtered, the pH of the filtrate was adjusted to 7 with  $\text{HCl}_{(\text{aq})}$  (10%, v/v) and it was dialyzed for 3 h to remove the salts. After evaporating the solvents under reduced pressure, the product was isolated as a white powder, (483 mg, 85%).  $R_f = 0.25$  (eluent *i*-PrOH:AcOEt: $\text{H}_2\text{O}$  5:3:1).  $^1\text{H}$  NMR ( $\text{D}_2\text{O}$ , 500 MHz, 298 K)  $\delta$  5.31 (bs, 2H, H1), 5.03 (bs, 5H, H1), 4.11-3.65 (26H, H3, H5, H6), 3.65-3.47 (14H, H2, H4), 3.4 (bs, 2H, H7), 3.06 (d,  $J = 13.0\text{ Hz}$ , 1H,  $\text{H6}_A$ ), 2.78 (dd,  $J = 13.0\text{ Hz}$ ,  $J = 4.0\text{ Hz}$ , 1H,  $\text{H6}'_A$ ), 2.69 (m, 2H, H9), 1.80 (m, 2H, H8).  $^{13}\text{C}$  NMR ( $\text{D}_2\text{O}$ , 298 K, 125 MHz)  $\delta$  102.4, 100.7 (C1), 81.4 (C4), 75.9 (C3), 72.7 (C2), 71.9 (C5), 60.3 (C6), 49.3 ( $\text{C6}_A$ , C7), 45.6 (C9), 27.9 (C8). IR ( $\text{cm}^{-1}$ )  $\nu$  2103.6 ( $-\text{N}_3$ ). MS (MALDI-TOF): m/z 1218.0  $[\text{M} + \text{H}]^+$ , calc. for  $[\text{C}_{45}\text{H}_{76}\text{N}_4\text{O}_{34}\text{H}]^+$ : 1218.09.

**Monomer 4.** To a solution of dry mono-[6-(3-azidopropylamino)-6-deoxy]- $\beta$ -cyclodextrin (30 mg, 0.024 mmol) in dry DMF (1.5 mL), 1-methyl-2-diphenylphosphanylterephthalate [4] (11.37 mg, 0.03 mmol) was added during 1 h and the solution was left under stirring for 15 min at 40 °C. Then, H<sub>2</sub>O (0.1 mL) was added and the solution was allowed to stir for 12 h at 40 °C. The solvents were evaporated under reduced pressure and the solid produced was dissolved in H<sub>2</sub>O and was washed with CHCl<sub>3</sub> (4  $\times$  15 mL) at pH 2. The aqueous phase was isolated, its pH was adjusted at 7 and was subjected to solid-phase extraction (SPE, Alumina-A) with H<sub>2</sub>O as the eluent. The desired product was isolated as white powder (35.1 mg, 95%).  $R_f = 0.29$  (eluent: *i*-PrOH:AcOEt:H<sub>2</sub>O 5:3:1). <sup>1</sup>H NMR (D<sub>2</sub>O, 500 MHz, 298 K)  $\delta$  8.27 (d,  $J = 14.0$  Hz, 1H, H2), 8.23 (d,  $J = 8.0$  Hz, 1H, H6), 7.86-7.69 (m, 5H, 4xH3' + H5), 7.70-7.60 (m, 5H, 2xH1', 4xH2'), 5.18-4.98 (m, 7H, H1), 4.10-3.72 (m, 21H, H3, H5, H6), 3.73-3.51 (m, 18H, H2, H4, H6), 3.47 (t,  $J = 9.0$  Hz, 1H, H4), 3.13 (d,  $J = 11.0$  Hz, 1H, H6), 2.96 (m, 1H, Hc), 2.94-2.79 (m, 2H, Hc' & H6'), 2.68 (m, 2H, Ha), 1.69 (m, 2H, Hb). <sup>13</sup>C NMR (D<sub>2</sub>O, 62.9 MHz)  $\delta$  173.1 (COOH), 171.0 (HN-C=O), terephthalic 141.8 (C1), 138.7 (C4), 134.7 (C2), 133.5 (C6), 133.4-126.9 (Ph, C1', C2', C3', terephthalic C5), 102.0 and 101.8 (CD-C1), 83.6, 81.9-80.1 (all CD-C4), 73.5-71.22, 70.24 (CD C2, C3, C5), 60.6-59.1 (CD-C6), 49.7 (CD-C6A), 46.0 (chain Cc), 36.7 (chain Ca), 27.5 (chain Cb). <sup>31</sup>P NMR, (D<sub>2</sub>O, 202.5 MHz, 298K)  $\delta$  35.2. MS (MALDI-TOF):  $m/z$  1539.1 [M+H]<sup>+</sup>, 1561.1 [M+Na]<sup>+</sup> and 1577.1 [M+K]<sup>+</sup>, calcd. for [C<sub>65</sub>H<sub>91</sub>N<sub>2</sub>O<sub>38</sub>PH]<sup>+</sup>: 1539.5, C<sub>65</sub>H<sub>91</sub>N<sub>2</sub>O<sub>38</sub>PNa<sup>+</sup>: 1561.5, C<sub>65</sub>H<sub>91</sub>N<sub>2</sub>O<sub>38</sub>PK<sup>+</sup>: 1577.5.

**Dimer 5.** To a solution of monomer **4** (48 mg, 0.03 mmol) in dry DMF (2 mL), HATU (1-[bis(dimethylamino)methylene]-1*H*-1,2,3-triazolo[4,5-*b*]pyridinium 3-oxide hexafluorophosphate, Aldrich) was gradually added (947.2 mg, 0.12 mmol) and the solution was left under stirring for 1 h at 0 °C. Diisopropylethylamine (15.8  $\mu$ L, 0.09 mmol) was subsequently added at rt until the pH of the solution was 8–9. Finally, mono(6-<sup>15</sup>N-amino-6-deoxy)- $\beta$ -cyclodextrin (38.7 mg, 0.03 mmol) was gradually added and the solution was stirred for 72 h

at 35 °C. During the reaction, the pH was always adjusted to 9 with additional diisopropylethylamine. The product was purified by successive solid-phase extractions (an SPE column packed with Alumina-A followed by an SPE column packed with silica gel modified with carboxy groups), by which excessive mono(6-<sup>15</sup>N-amino-6-deoxy)-β-cyclodextrin was removed. The pH of the solution was adjusted to 7 and dialyzed for 12 h. The desired product was isolated as a white solid (4 mg, 10%).  $R_f = 0.06$  (eluent *i*-PrOH:AcOEt:H<sub>2</sub>O 5:3:1). <sup>1</sup>H NMR (D<sub>2</sub>O, 298 K, 500 MHz)  $\delta$  8.19 (d,  $J = 8.0$  Hz, 1H, terephthalic H6), 8.05-7.37 (m, 12H, Ar), 5.23-5.00 (m, 14H, CD-H1, all), 4.18-3.85 (m, 53H, H3, H5, CD1-H6, CD2-H6) 3.84-3.33 (m, 31H, H2, H4, 2xH6', H6'), 3.28 (bs, 1H, CD2-H6'), 3.02 (bs, 3H, chain Hc, Ha), 1.89 (bs, 2H, chain Hb). <sup>13</sup>C NMR (D<sub>2</sub>O, 298 K, 62.9 MHz)  $\delta$  139.0-124.9 (Ar), 101.8 (CD-C1), 80.9, 80.6, 80.1 (all CD-C4), 73.0, 72.0, (CD C2, C3, C5), 59.9, 59.6 (CD1-C6), 48.8 (CD2-C6), 45.4 (chain Cc), 41.1 (CD2-C6), 35.8 (chain Ca), 25.7 (chain Cb). <sup>31</sup>P NMR (D<sub>2</sub>O, 298K, 202.5 MHz)  $\delta$  35.2. <sup>15</sup>N NMR (D<sub>2</sub>O, 298K, 50.7 MHz) 141.6. MS (MALDI-TOF):  $m/z$  2658.66 [M+H]<sup>+</sup> and 2680.56 [M+Na]<sup>+</sup>, calcd. for [C<sub>119</sub>H<sub>169</sub>N<sub>3</sub>O<sub>71</sub>P<sub>2</sub>H]<sup>+</sup>: 2656.37, [C<sub>119</sub>H<sub>169</sub>N<sub>3</sub>O<sub>71</sub>P<sub>2</sub>Na]<sup>+</sup>: 2678.37.

**Dimer 6.** To a solution of mono[6-(3-azidopropylamino)-6-deoxy]-β-cyclodextrin (12.5 mg, 0.01 mmol) in DMF (450 μL), dimethyl 2,5-(diphenylphosphanyl)terephthalate was added as a solution in dry CHCl<sub>3</sub> (2.7 mg, 0.0047 mmol in 100 μL of dry CHCl<sub>3</sub>). The reaction was stirred for 48 h, under argon, at 60 °C. H<sub>2</sub>O was then added (20 μL) and the reaction was left under stirring at 60 °C for additional 4 h. The reaction was terminated by addition of cold water and the solvents were evaporated under reduced pressure. The product was purified on a silica gel column chromatography using CH<sub>3</sub>CN:H<sub>2</sub>O (5:2 to 1:1, v/v) and then EtOH:H<sub>2</sub>O (1:1, v/v) as eluting solvents. The pure product was isolated as a white powder (8.4 mg, 62%).  $R_f = 0.08$  (eluent: CH<sub>3</sub>CN:H<sub>2</sub>O 5:2). <sup>1</sup>H NMR (D<sub>2</sub>O, 298 K, 500 MHz)  $\delta$  7.94-7.44 (m, 22H, 20xH-Ph, H2, H5), 5.06 (s, 14H, H1), 3.96 (br apparent d,  $J = 9.0$  Hz, 14H, H3), 3.90-3.70

(m, 38H, H5 & H6), 3.69-3.53 (m, 36H, H2 & H4), 3.44 (t,  $J = 9.0$  Hz, 2H, H4), 2.92 (apparent d,  $J = 10.0$  Hz, 2H, H6), 2.83 (s, 4H, chain Hc), 2.71 (t,  $J = 9.0$  Hz, 2H, H6<sub>A</sub>), 2.41 (s, 4H, chain Ha), 1.49 (s, 4H, chain Hb). <sup>1</sup>H NMR (DMSO-*d*<sub>6</sub>, 298 K, 500 MHz)  $\delta$  8.45 (s, 2H, -NH-C=O), 7.79-7.71 (dd,  $J = 13.0$  Hz,  $J = 3.0$  Hz, 2H, H2), 7.70-7.57 & 7.56-7.44 (20H, H-Ph), 5.88-5.60 (m, 28H, OH2 & OH3), 4.82 (s, 14H, H1), 4.62-4.34 (m, 12H, OH6), 3.76-3.45 (m, 52H, H3, H5, H6), 3.44-3.30 (m, 24H, H2, H4), 2.78 (d,  $J = 10.0$  Hz, 2H, H6<sub>A</sub>), 2.74-2.58 (m, 6H, 2xH6<sub>A</sub>, 4xHc), 2.36 (bs, 2H, Ha), 2.30 (bs, 2H, chain Ha), 1.27 (t,  $J = 6.0$  Hz, 4H, chain Hb), 1.23 (s, 2H, -NH-). <sup>13</sup>C NMR (D<sub>2</sub>O, 125 MHz)  $\delta$  168.6 (HN-C=O), 141.5 (Ph, C3), 135.0-127.8 (Ph, C1, C2, C4), 102.0, 101.7 (CD-C1), 83.6, 81.0 (CD-C4), 73.2 (CD-C3), 72.2 (CD-C5), 72.0 (CD-C2), 60.1 (CD-C6), 49.5 (CD-C6<sub>A</sub>), 46.1 (chain Ca), 37.2 (chain Cc), 27.8 (chain Cb). <sup>31</sup>P NMR (D<sub>2</sub>O, 298K, 202.5 MHz)  $\delta$  35.4. MS (MALDI-TOF):  $m/z$  2912.1 [M+H]<sup>+</sup>, 2934.6 [M+Na]<sup>+</sup>, calcd. for [C<sub>122</sub>H<sub>176</sub>N<sub>4</sub>O<sub>71</sub>P<sub>2</sub>H]<sup>+</sup>: 2912.0, [C<sub>122</sub>H<sub>176</sub>N<sub>4</sub>O<sub>71</sub>P<sub>2</sub>Na]<sup>+</sup>: 2934.0.

### Computational procedure

All semiempirical calculations were performed by the MOPAC 2012 program (Version 13.071L),[5] using the PM3 parameterization [6]. Molecular geometries were fully optimized by the Eigenvector Following approach (EF), using convergence criteria corresponding to a maximum gradient norm of 0.05 kcal mol<sup>-1</sup> Å<sup>-1</sup>. Solvation effects were treated by the Conductor-like Screening Model (COSMO) approach [7], using a dielectric constant of 78.4 (at 298 K)[8] and a radius of 1.3 Å for water. Density functional theory calculations were performed by the Gaussian 03 suite [9], using the B3P86 functional [10] with the 6-31G(d',p') basis set [11].

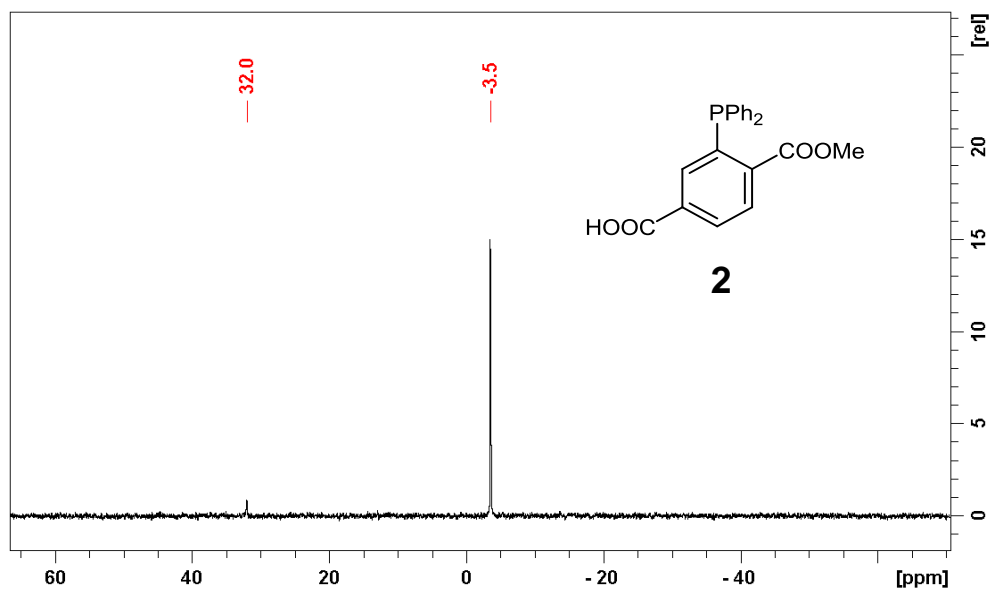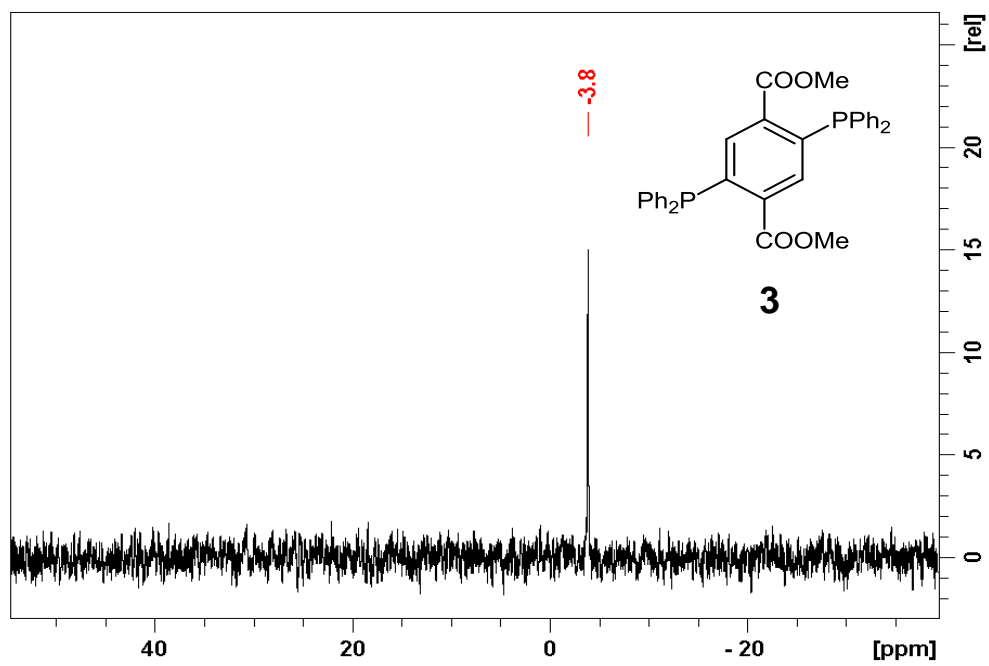

**Figure S1:**  $^{31}\text{P}$  NMR spectra of linkers **2** and **3** in dry  $\text{CDCl}_3$  (202.46 MHz, 298 K).

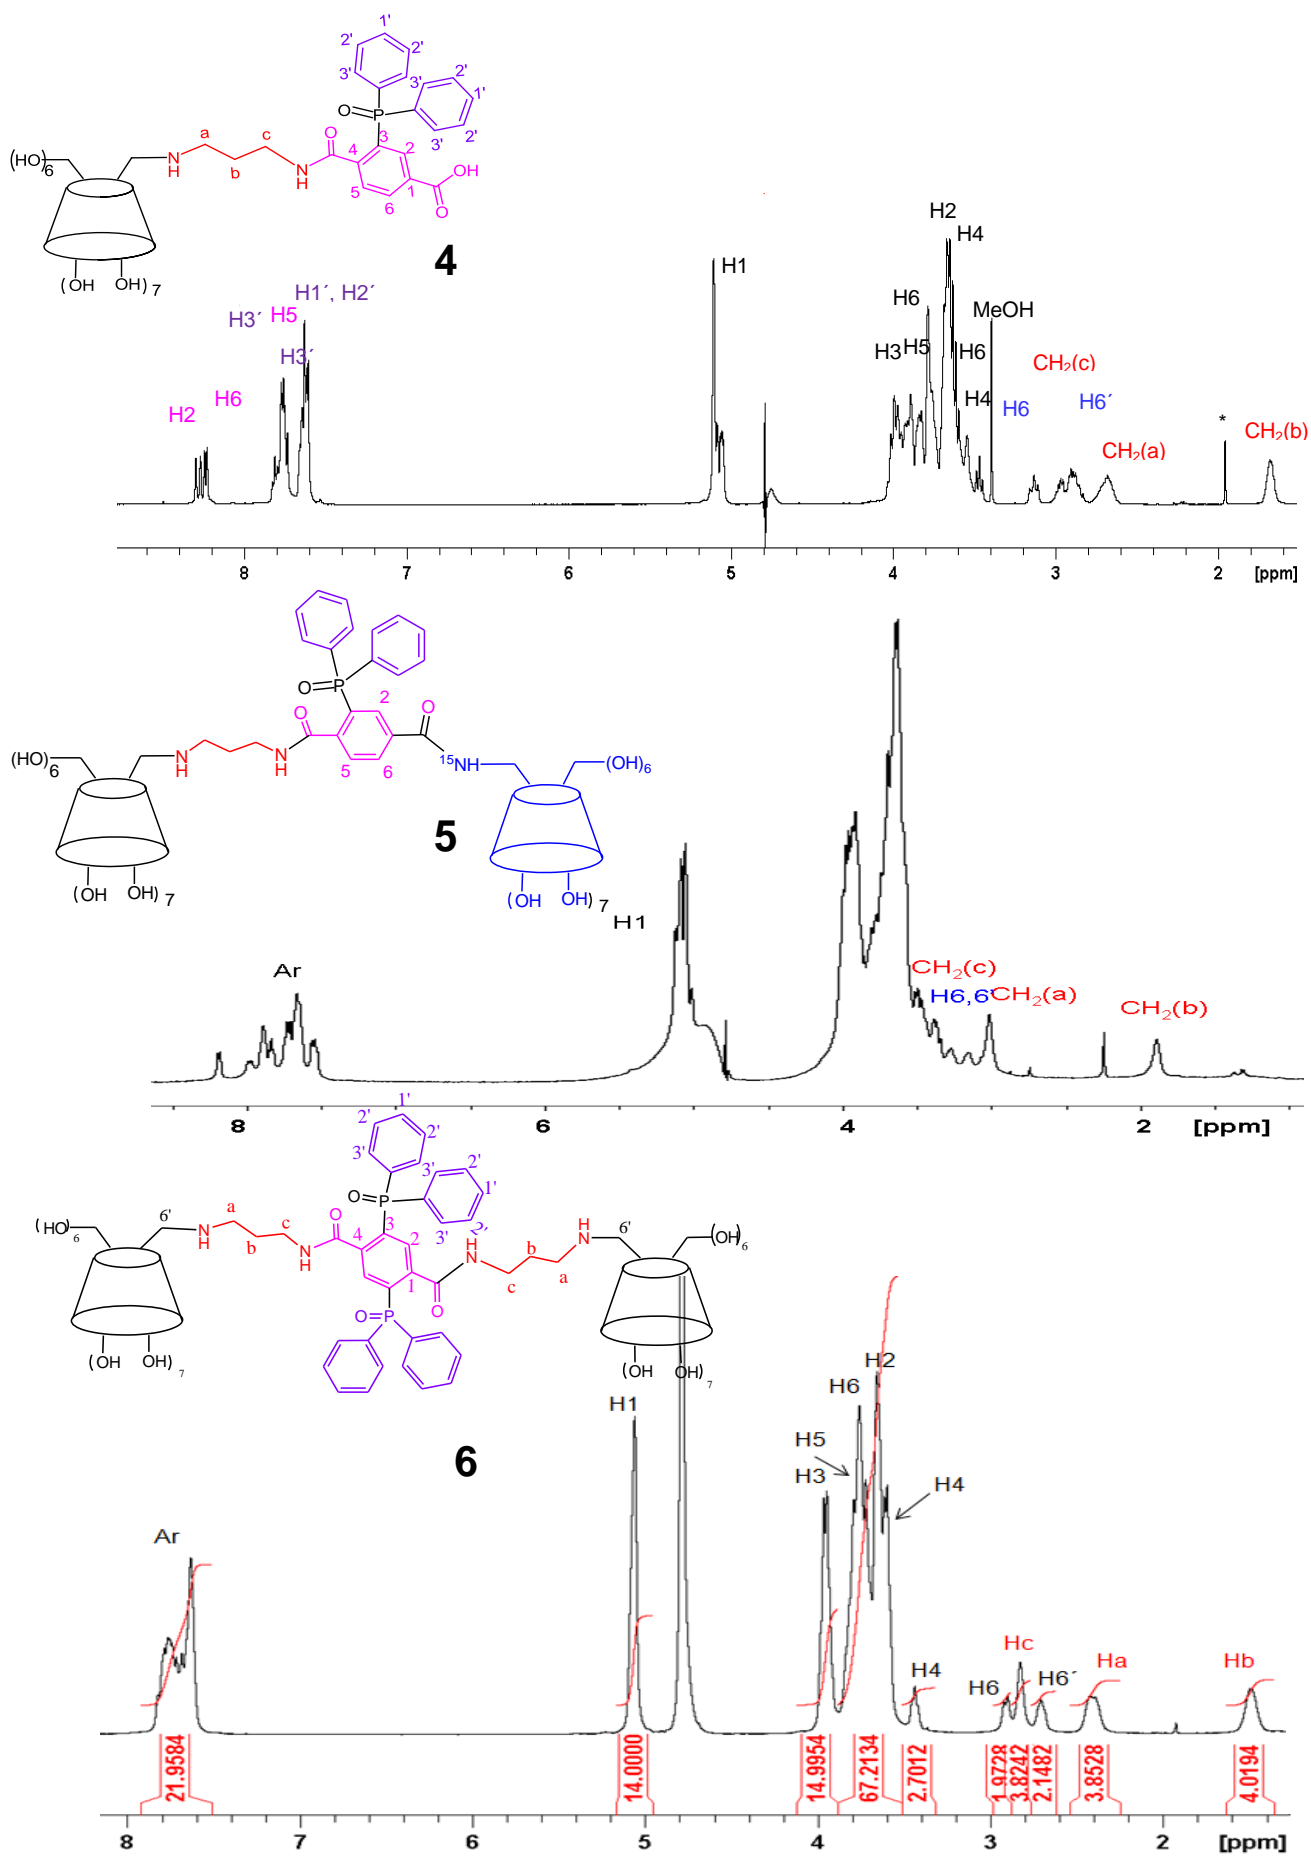

**Figure S2:**  $^1H$  NMR spectrum of Staudinger products in  $D_2O$  (500 MHz, 298 K): of **4** and **5** with presaturation of HDO and of **6**.



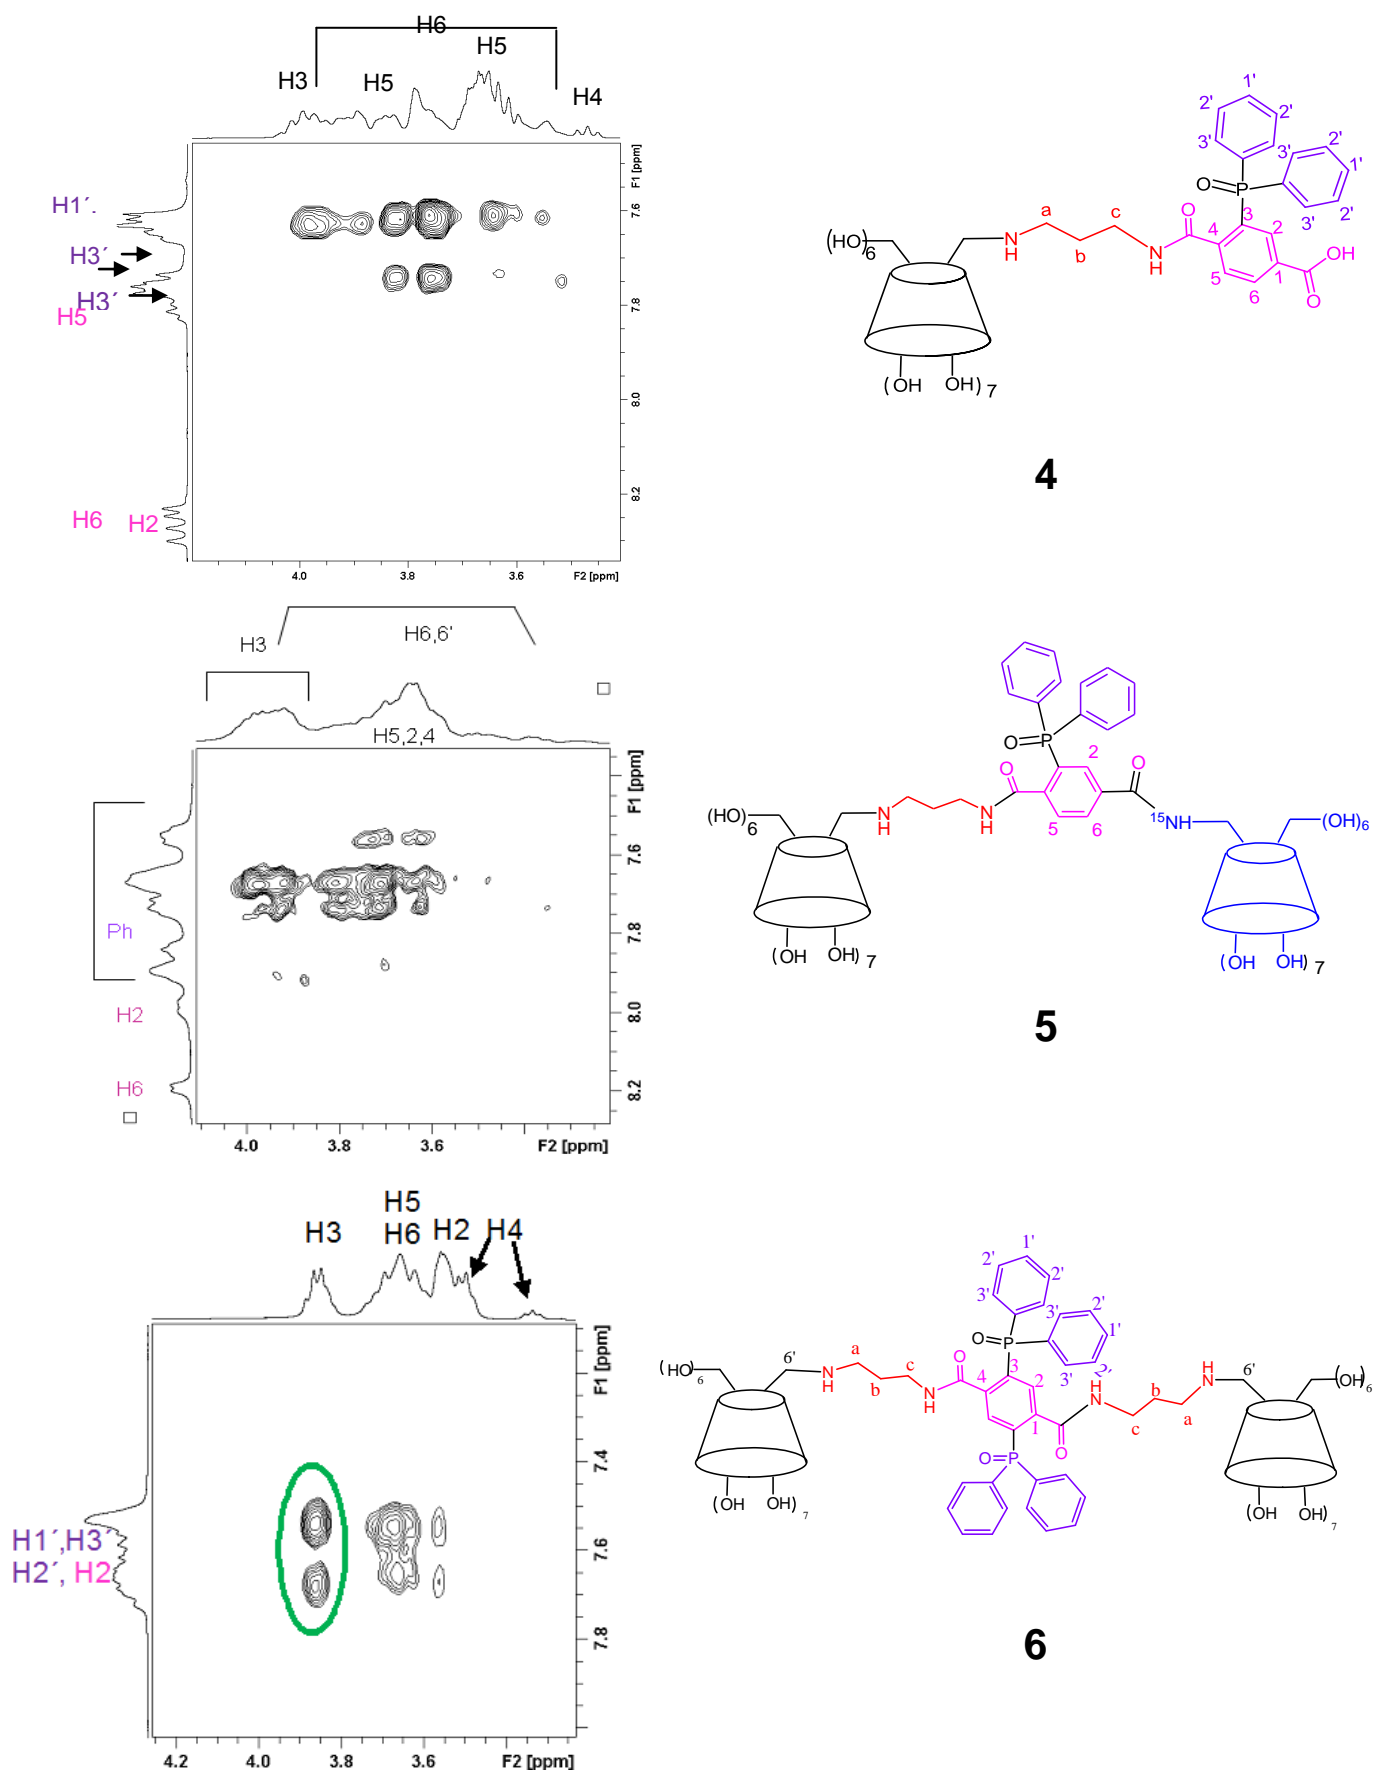

**Figure S3:** Partial 2D ROESY NMR spectra of monomer **4** and of dimers **5** and **6** in D<sub>2</sub>O (500 MHz, 298K): interactions between phenyl (and not terephthalic) protons and all  $\beta$ CD cavity protons (H3, H5, H6,6') are observed.

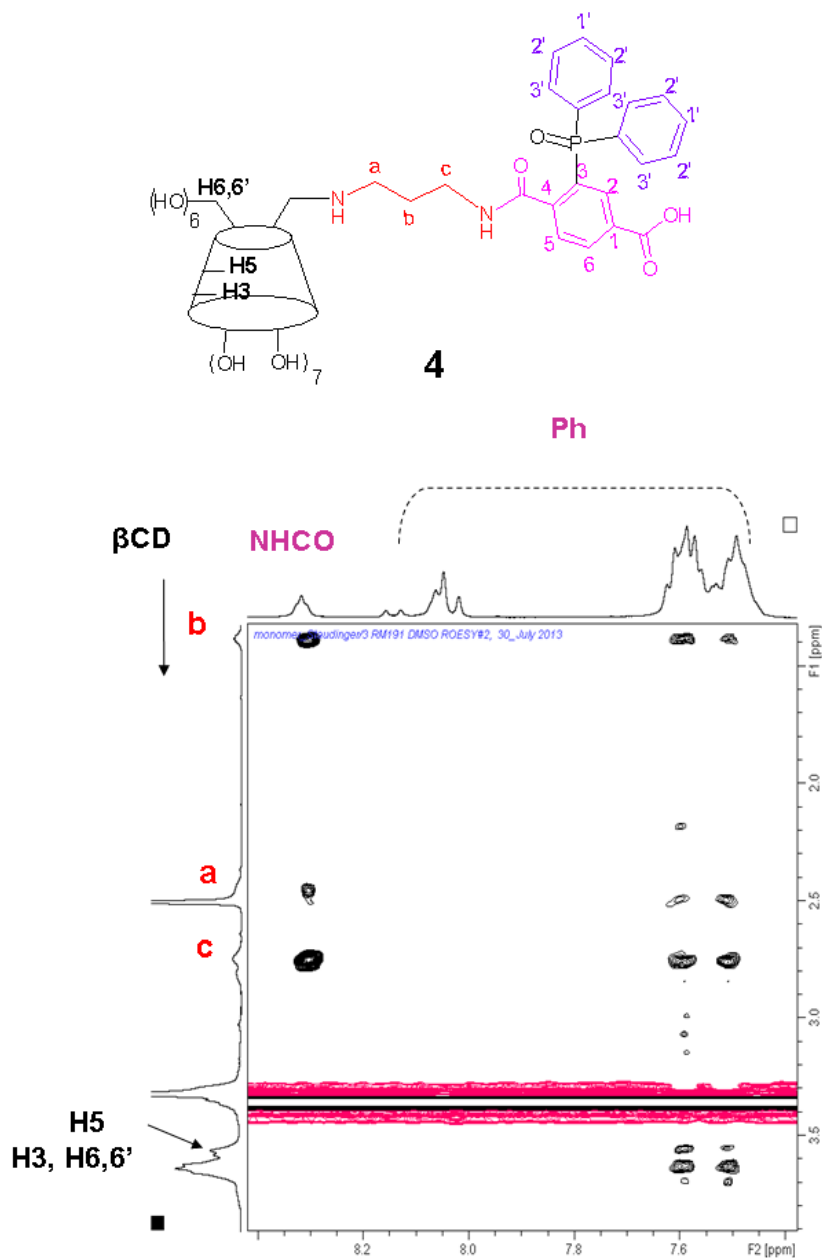

**Figure S4:** Partial 2D ROESY NMR spectrum of compound **4** in DMSO- $d_6$  (500 MHz, 298 K): interactions of phenyl protons with primary  $\beta$ CD side protons (H6,6', H5) and with chain protons **a**, **b** and **c** are observed.

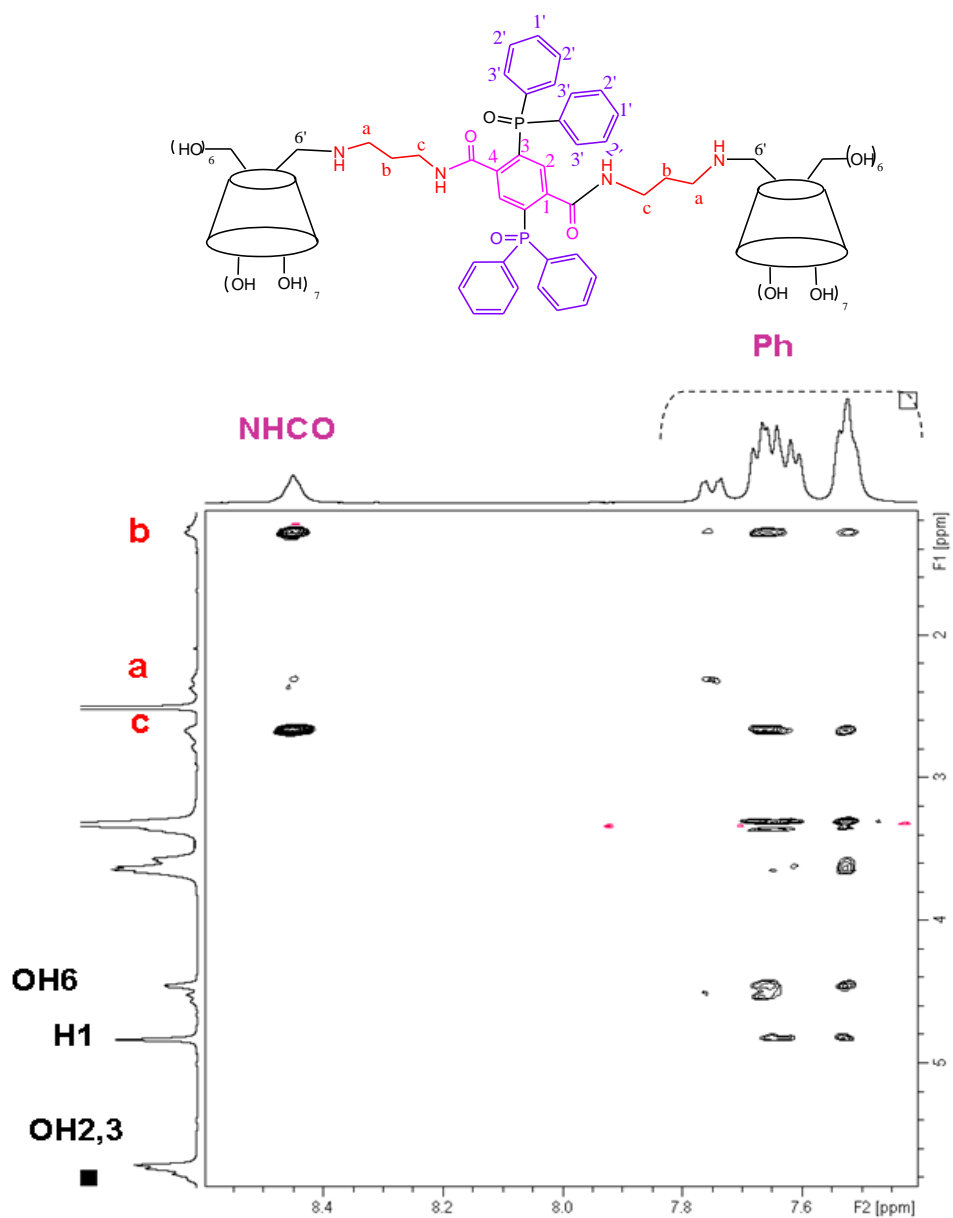

**Figure S5:** Partial 2D ROESY NMR spectrum of dimer **6** in DMSO- $d_6$  (500 MHz, 298 K): interactions of phenyl protons with primary  $\beta$ CD side protons (OH6) and with external ones (H1, H2, H4) as well as with chain protons a, b and c are observed but not with wider side groups OH2 and OH3.

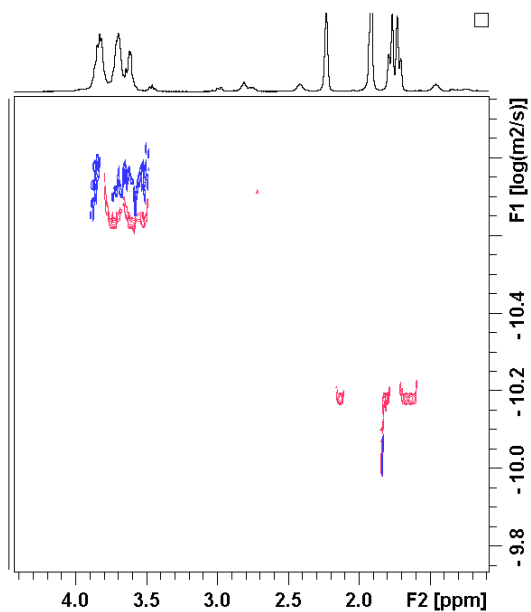

**Figure S6:** 2D DOSY NMR spectrum of dimer **6** in D<sub>2</sub>O alone (1 mM, blue contours) and in the presence of 4 equivalent of 1-adamantylamine-HCl (red contours), 298 K. The water diffusion peak was taken as reference.

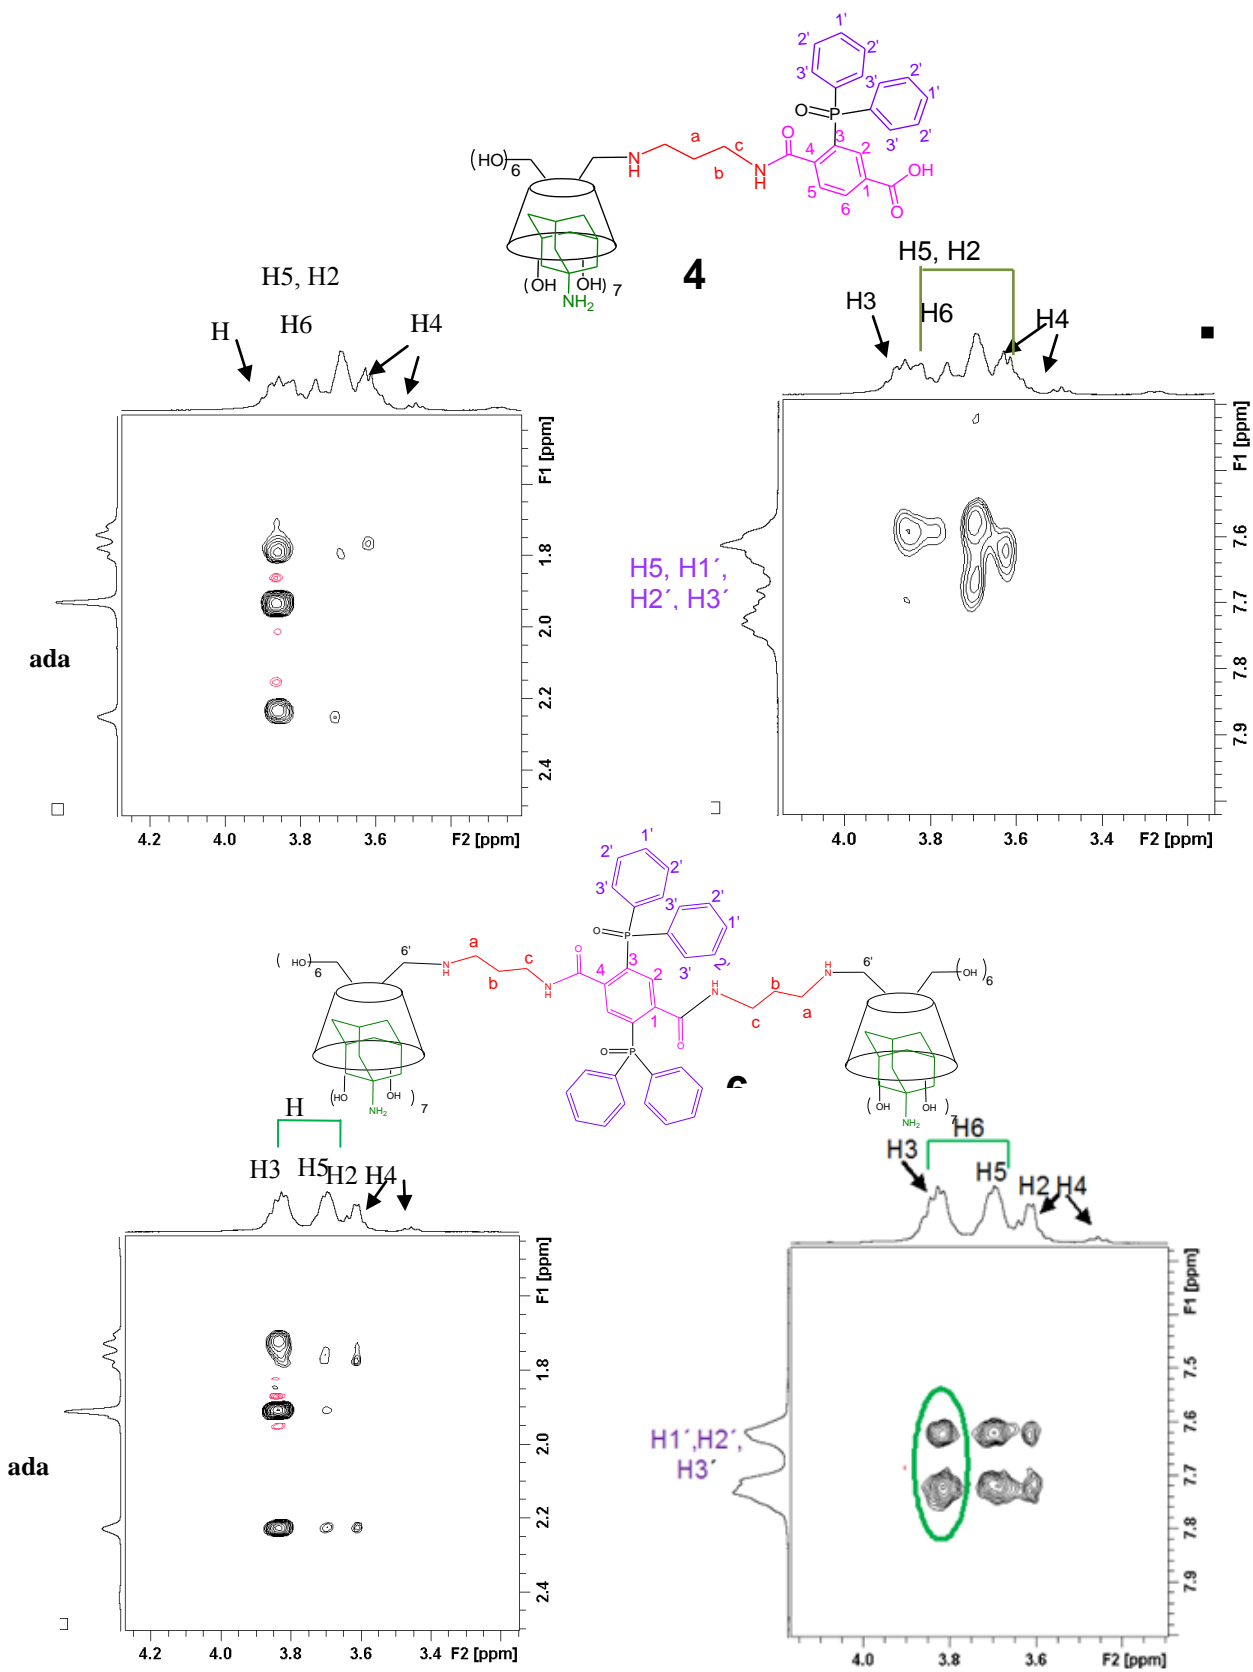

**Figure S7:** Partial 2D ROESY spectra (D<sub>2</sub>O, 500 MHz, 297 K ) of the monomer **4** (0.5 mM) with 1 equivalent of 1-adamantylamine-HCl (**ada**), and the dimer **6** (1 mM) with 4 equivalents of **ada**. Left: **ada** vs  $\beta$ CD region; right: phenyl vs  $\beta$ CD region.

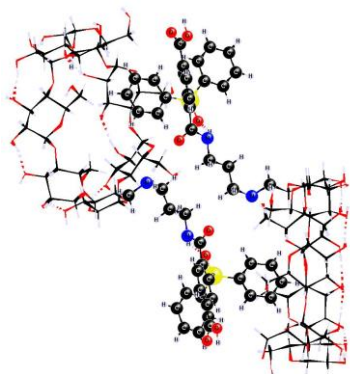

**Double Inclusion (Primary side)**

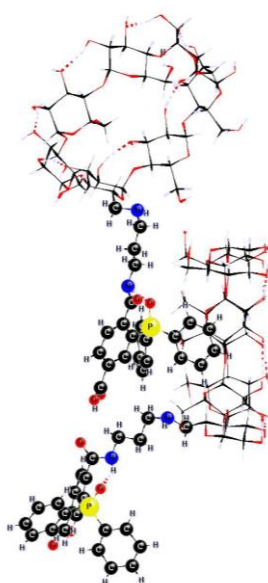

**Single Inclusion (Primary side)**

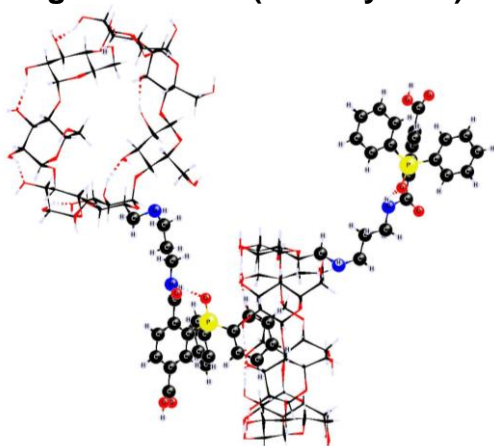

**Inclusion (Secondary side)**

**Figure S8:** Geometries of three typical arrangements for a pair of monomers **4** at the PM3(COSMO) level of theory.

**Table S1:** The minimum distances (Å) between H atoms of the phenyl rings and glucopyranose H atom of  $\beta$ CD for each limiting case of monomer **4** and dimer **6**, as well as for a pair of monomers **4** calculated at the PM3(COSMO) level of theory.<sup>a</sup>

| <b>1. Monomer 4</b>        |                     |                       |                  |                       |                  |                       |                       |                       |
|----------------------------|---------------------|-----------------------|------------------|-----------------------|------------------|-----------------------|-----------------------|-----------------------|
| Type                       | Phenyl <sup>b</sup> | CD-H1                 | CD-H2            | CD-H3                 | CD-H4            | CD-H5                 | CD-H6                 | CD-H6'                |
| Inclusion                  | A                   | 4.77<br>(7.22)        | 5.45<br>(7.65)   | <b>3.00</b><br>(5.13) | 4.58<br>(7.03)   | <b>1.70</b><br>(4.19) | <b>3.45</b><br>(5.51) | <b>3.36</b><br>(5.62) |
|                            | B                   | 4.56<br>(6.73)        | 6.27<br>(7.97)   | 5.76<br>(8.00)        | 4.82<br>(7.17)   | <b>3.20</b><br>(5.61) | <b>2.56</b><br>(4.85) | <b>1.74</b><br>(4.30) |
| Vicinal                    | A                   | 4.63<br>(7.09)        | 6.34<br>(8.61)   | 5.64<br>(7.52)        | 4.81<br>(7.16)   | <b>3.13</b><br>(5.03) | <b>1.72</b><br>(4.43) | <b>1.75</b><br>(4.30) |
|                            | B                   | 5.65<br>(7.89)        | 6.73<br>(8.93)   | 6.54<br>(8.24)        | 5.43<br>(7.57)   | <b>3.77</b><br>(5.57) | <b>1.71</b><br>(4.21) | <b>2.89</b><br>(4.91) |
| Open                       | A                   | 6.71<br>(8.99)        | 6.45<br>(8.71)   | 9.12<br>(11.31)       | 6.54<br>(8.67)   | 7.90<br>(10.50)       | 6.87<br>(9.45)        | 5.17<br>(7.80)        |
|                            | B                   | 9.65<br>(12.13)       | 10.63<br>(12.84) | 12.37<br>(14.81)      | 10.16<br>(12.38) | 10.37<br>(13.00)      | 9.26<br>(11.73)       | 7.97<br>(10.40)       |
| <b>2. Dimer 6</b>          |                     |                       |                  |                       |                  |                       |                       |                       |
| Type                       | Phenyl <sup>b</sup> | CD-H1                 | CD-H2            | CD-H3                 | CD-H4            | CD-H5                 | CD-H6                 | CD-H6'                |
| Inclusion/Vicinal          | A                   | 4.74<br>(6.48)        | 4.75<br>(6.79)   | <b>1.76</b><br>(4.23) | 4.19<br>(6.44)   | <b>1.70</b><br>(4.23) | <b>3.62</b><br>(6.55) | <b>3.35</b><br>(5.81) |
|                            | B                   | 4.98<br>(6.20)        | 6.37<br>(8.17)   | 5.01<br>(6.79)        | 4.80<br>(7.61)   | <b>2.58</b><br>(4.40) | <b>1.75</b><br>(4.26) | <b>1.78</b><br>(4.71) |
|                            | A'                  | 4.91<br>(7.12)        | 6.59<br>(8.46)   | 5.92<br>(8.21)        | 4.97<br>(7.41)   | <b>3.42</b><br>(5.78) | <b>1.70</b><br>(3.99) | <b>1.76</b><br>(4.35) |
|                            | B'                  | 4.90<br>(6.68)        | 6.33<br>(7.93)   | 5.96<br>(7.92)        | 4.86<br>(6.98)   | <b>3.32</b><br>(5.29) | <b>2.52</b><br>(3.67) | <b>1.76</b><br>(4.28) |
| Inclusion                  | A                   | 4.96<br>(7.11)        | 5.37<br>(7.30)   | <b>2.58</b><br>(4.93) | 4.51<br>(6.59)   | <b>1.70</b><br>(4.25) | <b>3.27</b><br>(6.23) | <b>3.26</b><br>(5.45) |
|                            | B                   | <b>3.87</b><br>(6.18) | 5.47<br>(7.27)   | 5.70<br>(7.65)        | 4.66<br>(7.12)   | <b>3.12</b><br>(5.01) | <b>1.72</b><br>(4.15) | <b>1.79</b><br>(4.73) |
|                            | A'                  | 4.59<br>(7.05)        | 5.31<br>(7.69)   | <b>2.76</b><br>(5.08) | 4.54<br>(6.99)   | <b>1.71</b><br>(4.63) | <b>2.75</b><br>(5.43) | <b>3.09</b><br>(5.42) |
|                            | B'                  | 5.65<br>(6.46)        | 6.81<br>(8.16)   | 6.19<br>(7.10)        | 5.43<br>(7.15)   | <b>3.55</b><br>(5.31) | <b>1.78</b><br>(4.35) | <b>2.64</b><br>(4.39) |
| Vicinal                    | A                   | 5.15<br>(7.04)        | 6.65<br>(8.53)   | 6.65<br>(8.74)        | 5.19<br>(7.35)   | <b>3.91</b><br>(6.12) | <b>1.70</b><br>(4.24) | <b>2.40</b><br>(4.65) |
|                            | B                   | 7.58<br>(9.89)        | 9.52<br>(11.60)  | 9.96<br>(12.49)       | 7.84<br>(10.12)  | 7.43<br>(10.11)       | 5.03<br>(7.69)        | 5.49<br>(8.19)        |
|                            | A'                  | 5.18<br>(7.06)        | 6.69<br>(8.49)   | 6.57<br>(8.59)        | 5.33<br>(7.59)   | <b>3.89</b><br>(6.02) | <b>1.71</b><br>(4.09) | <b>2.35</b><br>(4.72) |
|                            | B'                  | 8.12<br>(10.13)       | 9.47<br>(11.76)  | 9.67<br>(11.84)       | 8.03<br>(10.26)  | 6.89<br>(9.13)        | 5.08<br>(7.84)        | 5.80<br>(8.31)        |
| Open                       | A                   | 6.87<br>(9.66)        | 7.54<br>(10.02)  | 9.78<br>(12.45)       | 6.78<br>(9.58)   | 9.38<br>(12.20)       | 8.35<br>(11.18)       | 8.12<br>(11.01)       |
|                            | B                   | 6.60<br>(9.48)        | 7.11<br>(9.80)   | 10.01<br>(12.76)      | 7.79<br>(10.62)  | 9.45<br>(12.27)       | 8.47<br>(11.20)       | 8.41<br>(11.27)       |
|                            | A'                  | 6.20<br>(8.76)        | 7.41<br>(10.17)  | 9.40<br>(12.12)       | 6.40<br>(9.20)   | 9.18<br>(12.00)       | 8.26<br>(11.08)       | 8.03<br>(10.77)       |
|                            | B'                  | 8.13<br>(10.98)       | 7.13<br>(10.00)  | 10.11<br>(12.94)      | 7.80<br>(10.60)  | 10.18<br>(13.03)      | 9.39<br>(11.51)       | 9.93<br>(12.65)       |
| <b>3. Monomer 4 pair</b>   |                     |                       |                  |                       |                  |                       |                       |                       |
| Type                       | Phenyl <sup>b</sup> | CD-H1                 | CD-H2            | CD-H3                 | CD-H4            | CD-H5                 | CD-H6                 | CD-H6'                |
| Single Inclusion (Primary) | A                   | 4.53<br>(6.86)        | 5.40<br>(7.75)   | <b>2.82</b><br>(4.95) | 4.50<br>(6.43)   | <b>1.72</b><br>(4.26) | <b>3.49</b><br>(6.10) | <b>3.06</b><br>(5.93) |
|                            | B                   | 5.79<br>(6.61)        | 7.26<br>(8.11)   | 6.80<br>(7.55)        | 6.06<br>(6.84)   | 4.06<br>(5.08)        | <b>2.41</b><br>(4.04) | <b>3.16</b><br>(4.16) |

|                               |    |                  |                  |                       |                  |                       |                       |                       |
|-------------------------------|----|------------------|------------------|-----------------------|------------------|-----------------------|-----------------------|-----------------------|
|                               | A' | 7.78<br>(10.20)  | 7.97<br>(10.15)  | 10.01<br>(12.43)      | 7.39<br>(9.67)   | 8.41<br>(11.11)       | 6.98<br>(9.61)        | 5.51<br>(8.17)        |
|                               | B' | 10.25<br>(12.86) | 11.36<br>(13.77) | 12.69<br>(15.30)      | 10.67<br>(13.05) | 10.40<br>(13.11)      | 9.22<br>(11.74)       | 8.22<br>(10.73)       |
| Double Inclusion<br>(Primary) | A  | 4.65<br>(6.53)   | 5.63<br>(7.88)   | <b>3.64</b><br>(5.82) | 4.80<br>(7.03)   | <b>1.74</b><br>(4.32) | <b>1.75</b><br>(4.48) | <b>1.75</b><br>(4.32) |
|                               | B  | 7.09<br>(9.56)   | 7.50<br>(9.75)   | 8.26<br>(10.50)       | 7.43<br>(9.89)   | 5.50<br>(7.93)        | 4.12<br>(6.43)        | 4.59<br>(6.45)        |
|                               | A' | 4.73<br>(7.18)   | 5.59<br>(7.75)   | <b>3.39</b><br>(5.42) | 4.61<br>(7.03)   | <b>1.71</b><br>(4.26) | <b>2.91</b><br>(5.18) | <b>2.50</b><br>(4.80) |
|                               | B' | 6.34<br>(8.83)   | 6.72<br>(8.90)   | 7.31<br>(9.72)        | 6.83<br>(9.22)   | 4.52<br>(7.01)        | <b>3.39</b><br>(5.44) | <b>3.80</b><br>(6.67) |
| Inclusion<br>(Secondary)      | A  | 4.72<br>(6.61)   | 4.80<br>(7.29)   | <b>1.72</b><br>(4.31) | 4.21<br>(6.53)   | <b>1.75</b><br>(4.10) | <b>3.95</b><br>(6.23) | <b>3.64</b><br>(5.73) |
|                               | B  | 5.67<br>(7.10)   | 4.58<br>(6.67)   | <b>3.28</b><br>(5.08) | 5.76<br>(7.83)   | 5.96<br>(7.31)        | 7.59<br>(10.27)       | 5.94<br>(8.62)        |
|                               | A' | 7.01<br>(9.27)   | 7.34<br>(9.48)   | 9.67<br>(11.94)       | 7.16<br>(9.33)   | 8.20<br>(10.82)       | 7.22<br>(9.82)        | 5.55<br>(8.16)        |
|                               | B' | 10.18<br>(12.63) | 11.34<br>(13.57) | 12.72<br>(15.19)      | 10.57<br>(12.81) | 10.54<br>(13.17)      | 9.28<br>(12.09)       | 8.21<br>(10.63)       |

<sup>a</sup>Values in parentheses denote the average distance between the particular glucopyranose H atom with all five H atoms of the nearest phenyl ring. <sup>b</sup>A and/or A' = the phenyl inside or on top  $\beta$ CD moiety; B and/or B' = the phenyl outside or farthest from  $\beta$ CD moiety. Average values for all five hydrogen atoms of corresponding phenyl group in parentheses. Close distances (< 4 Å) in **bold**.



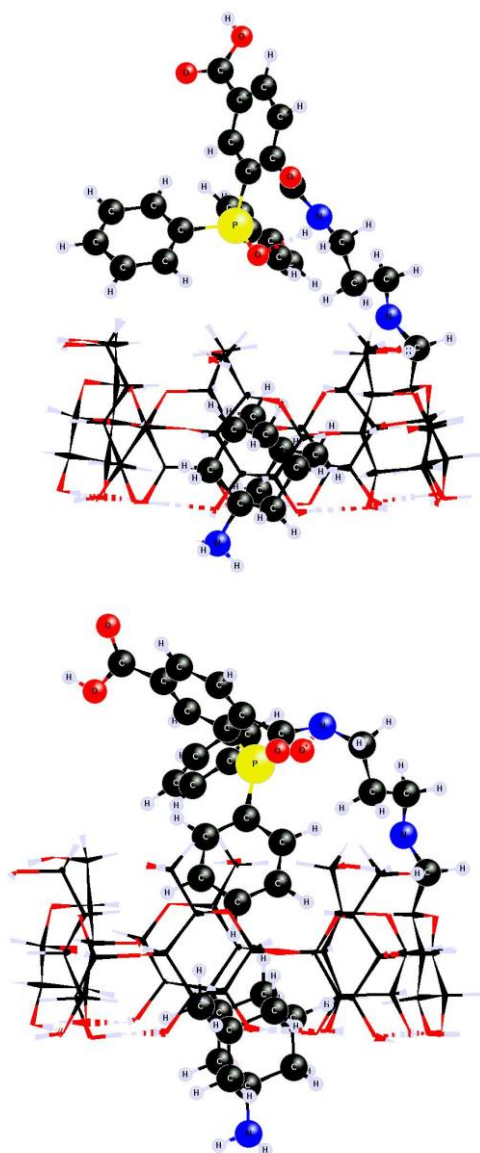

**Figure S9:** Geometries of the complexes between the vicinal configuration (top) and the inclusion configuration (bottom) of **4** with 1-adamantylammonium at the PM3(COSMO) level of theory.

## References

1. Zhou, Q.; Swager, T. *J. Am. Chem. Soc.* **1995**, *117*, 12593-12602.
2. Benin, V.; Durganala, S.; Morgan, A. B. *J. Mater. Chem.* **2012**, *22*, 1180-1190.
3. Brady, B.; Lynam, N.; O'Sullivan, T.; Ahern, C.; Darcy, R. *Org. Synth.* **2000**, *77*, 220-224.
4. Saxon, E.; Bertozzi, C. R. *Science* **2000**, *287*, 2007-2010.
5. Stewart, J. J. P. *MOPAC2012, Version 13.071L*, Stewart Computational Chemistry, Colorado Springs, CO, USA, web: <http://OpenMOPAC.net>.
6. Stewart, J. J. P. *J. Comput. Chem.* **1989**, *10*, 209 - 220.
7. Klamt, A.; Schümann, G. *J. Chem. Soc. Perkin Trans. 2* **1993**, 799 - 805.
8. *CRC Handbook of Chemistry and Physics*, CRC Press, Inc.: Boca Raton, Florida, 2001.

9. *Gaussian 03* Revision D.01, Gaussian, Inc, Wallingford CT, 2004
10. a) Becke, A. D. *J. Chem. Phys.* **1993**, *98*, 5648-5652; b) Perdew, J. P. *Phys. Rev. B* **1986**, *33*, 8822-8824
11. Petersson, G. A.; A. Bennett, A.; Tensfeldt, T. G. ; al-Laham, M. A.; Shirley, W. A.; Mantziaris, J. *J. Chem. Phys.* **1988**, *89*, 2193-2218.
